# Supplementary material
Source: publisher figshare collection journal article supplement (https://acs.figshare.com/ndownloader/files/15579890)
Supplement: Supplementary file 1 [file 15579890]

## *Supporting Information*

# **A Hybrid Electrocatalyst with Coordinatively Unsaturated MOF Shell and Hollow Ni<sub>3</sub>S<sub>2</sub>/NiS Core for OER Application**

Jingjing Wang and Hua Chun Zeng\*

*Department of Chemical and Biomolecular Engineering, Faculty of Engineering, National University of Singapore, 10 Kent Ridge Crescent, Singapore 119260*

\* Email: [chezhc@nus.edu.sg](mailto:chezhc@nus.edu.sg)

## **Contents**

|                           |                         |
|---------------------------|-------------------------|
| <b>Figures S1 to S24:</b> | Pages S-2 to Page S-25  |
| <b>Tables S1 and S3:</b>  | Pages S-26 to Page S-27 |
| <b>References:</b>        | Pages S-27 to Page S-28 |

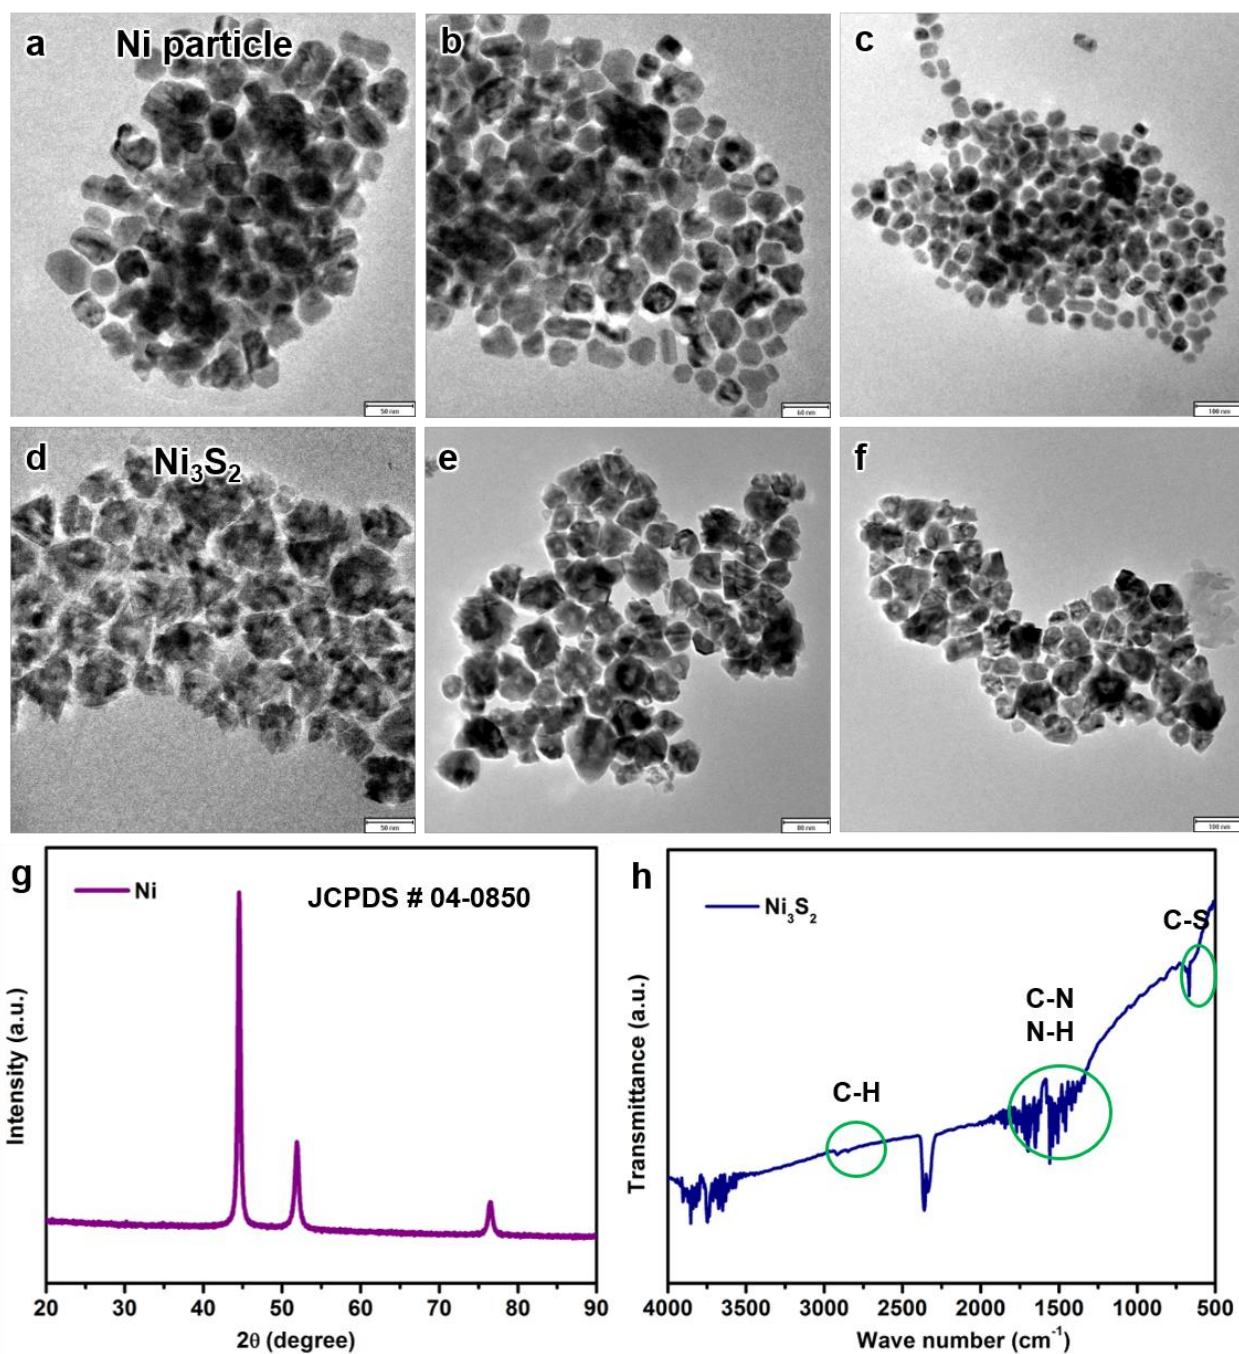

**Figure S1.** (a-c) TEM images of colloidal Ni nanoparticles, (d-f) TEM images of  $\text{Ni}_3\text{S}_2$  hollow nanoparticles, (g) XRD pattern of Ni nanoparticles, and (h) FTIR spectrum of organic ligands encapsulated  $\text{Ni}_3\text{S}_2$  hollow nanoparticles.

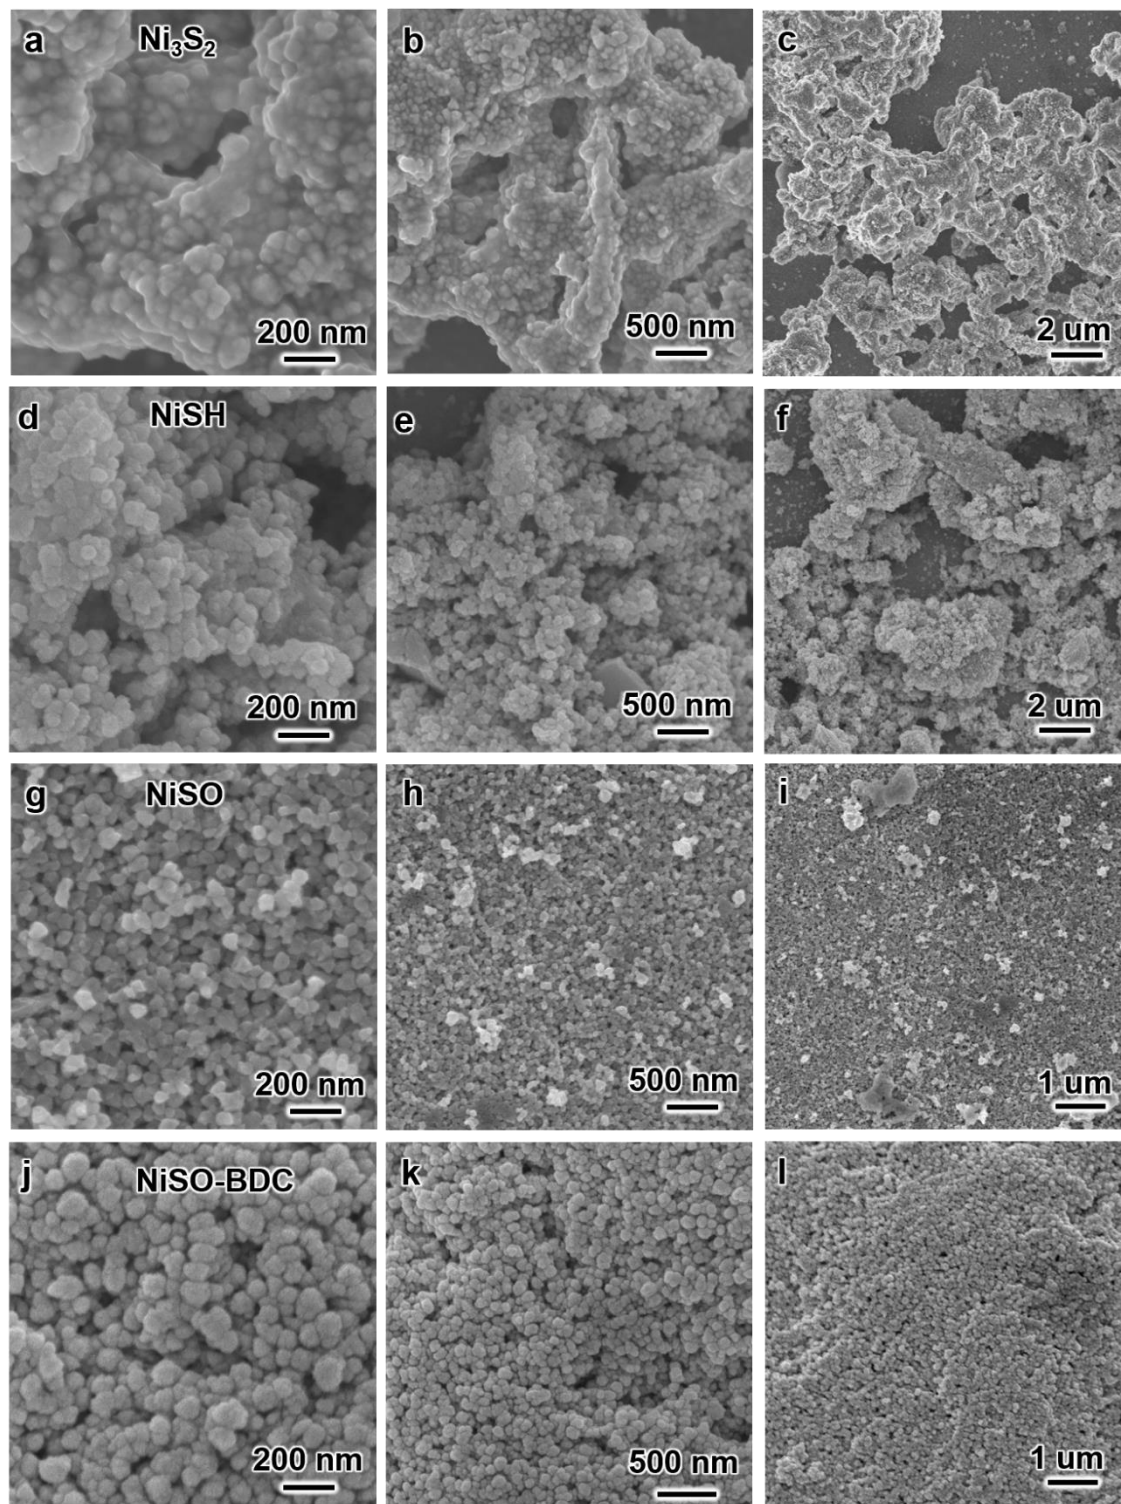

**Figure S2.** SEM images of (a-c)  $\text{Ni}_3\text{S}_2$  hollow nanoparticles, (d-f)  $\text{NiSH}$  hollow nanoparticles (i.e.,  $\text{Ni}_3\text{S}_2$  after heat treatment under 5%  $\text{H}_2/\text{Ar}$  atmosphere), (g-i)  $\text{NiSO}$  hollow nanoparticles, and (j-l)  $\text{NiSO-BDC}$  hollow nanoparticles.

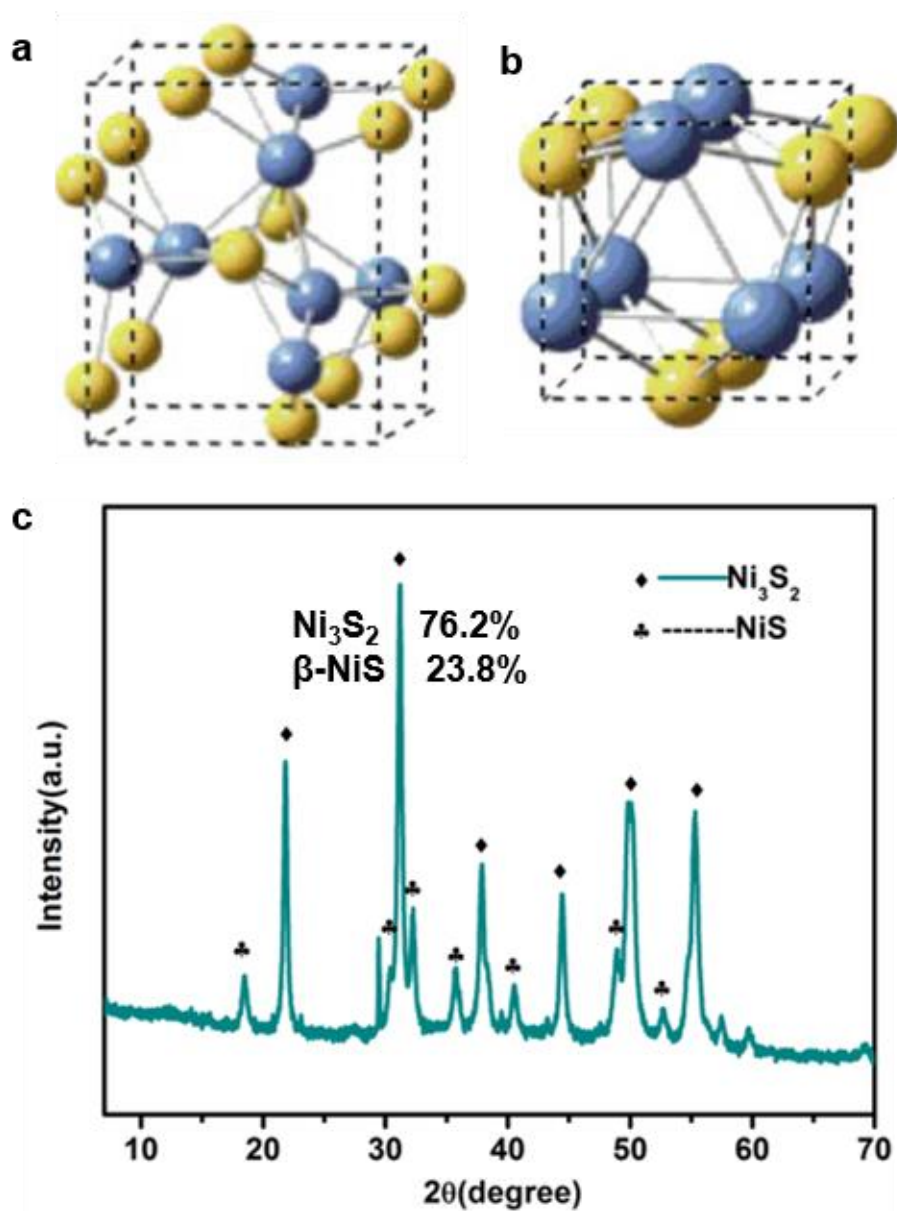

**Figure S3.** (a, b) Unit cell structures of  $\text{Ni}_3\text{S}_2$  and  $\text{NiS}$  respectively,<sup>1</sup> and (c) XRD patterns of  $\text{NiSO}$  (i.e.,  $\text{Ni}_3\text{S}_2/\text{NiS}$ ) and the calculated weight percentages of  $\text{Ni}_3\text{S}_2$  and  $\text{NiS}$  in the  $\text{NiSO}$  sample.



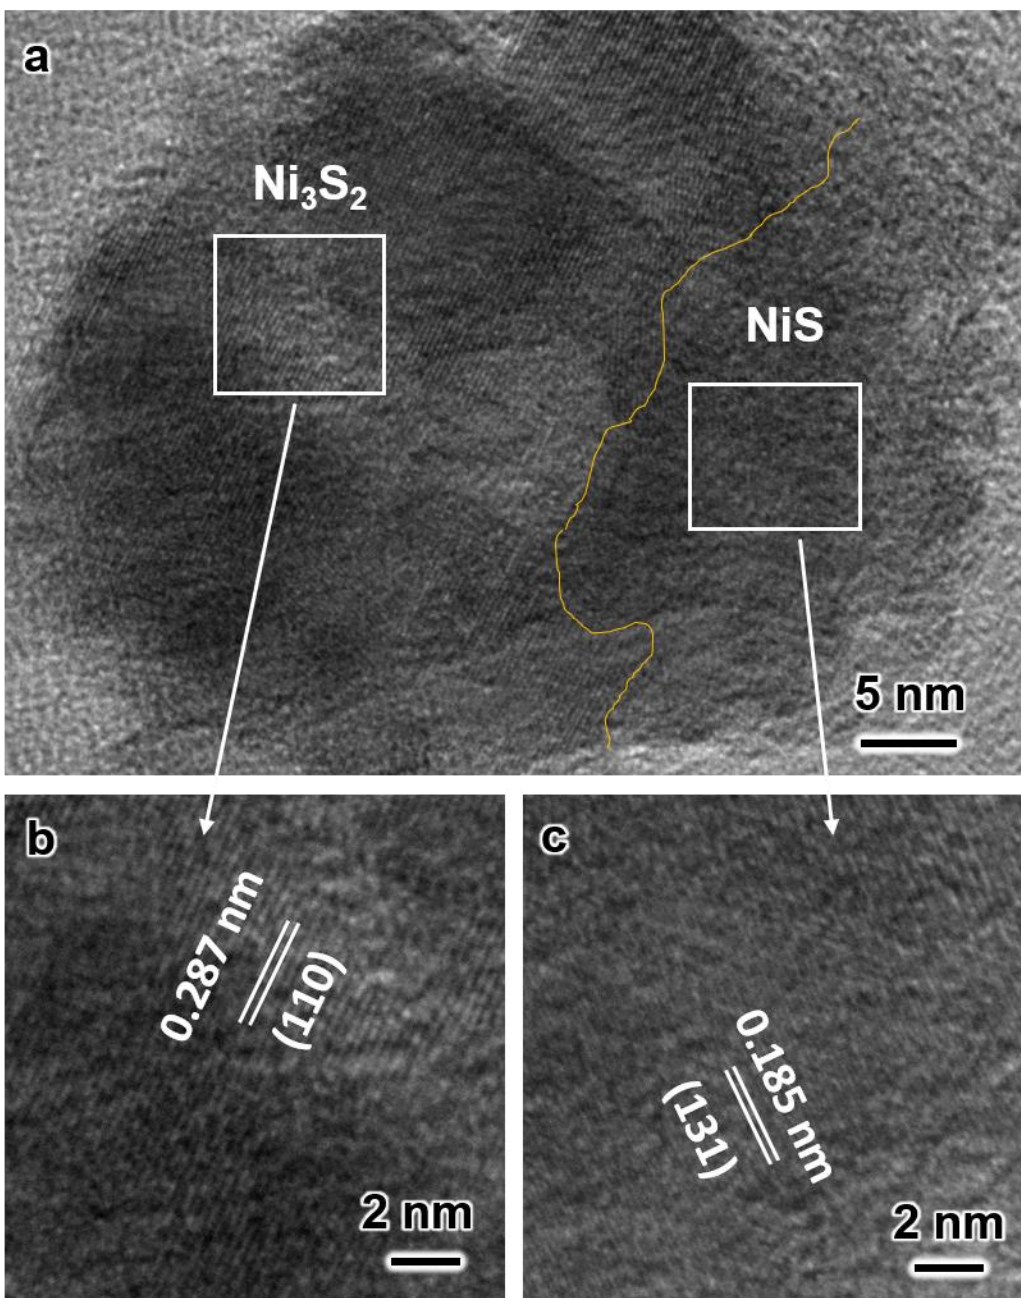

**Figure S4.** (a) TEM image of a NiSO hollow nanoparticle, and (b and c) high-resolution TEM images for the two framed areas of (a). The yellow thread in (a) indicates the biphasic boundary between  $\text{Ni}_3\text{S}_2$  and  $\text{NiS}$ .

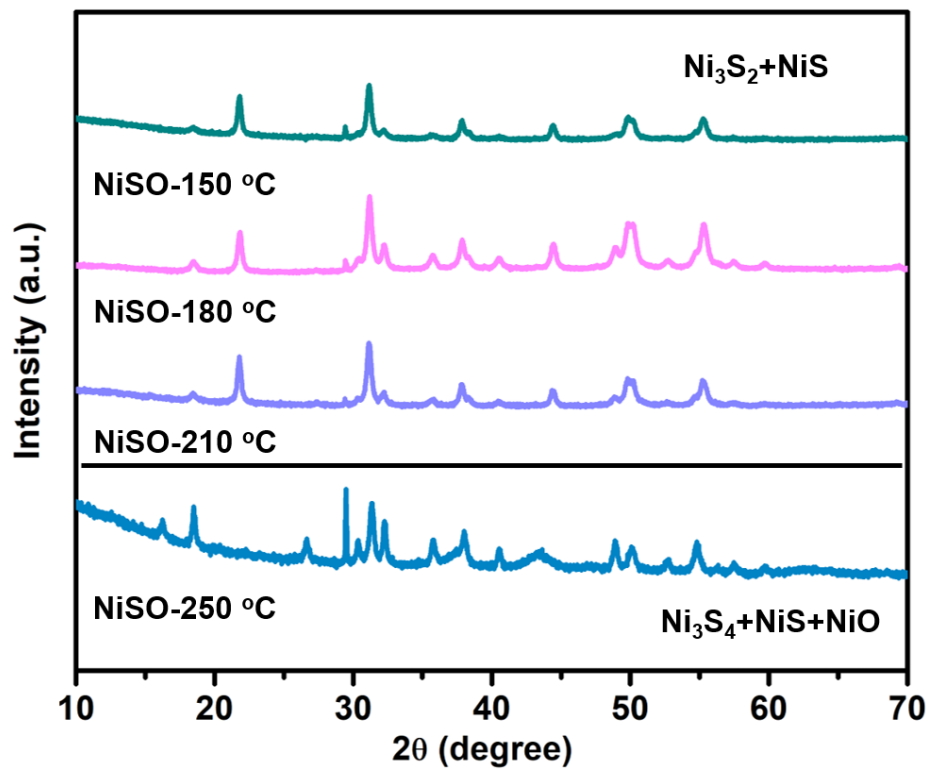

**Figure S5.** XRD patterns of NiSO (i.e.,  $\text{Ni}_3\text{S}_2/\text{NiS}$ ) treated at different temperatures (150°C, 180°C, 210°C, 250°C) in air environment. See Figure S11 for the peak assignment of NiO phase.

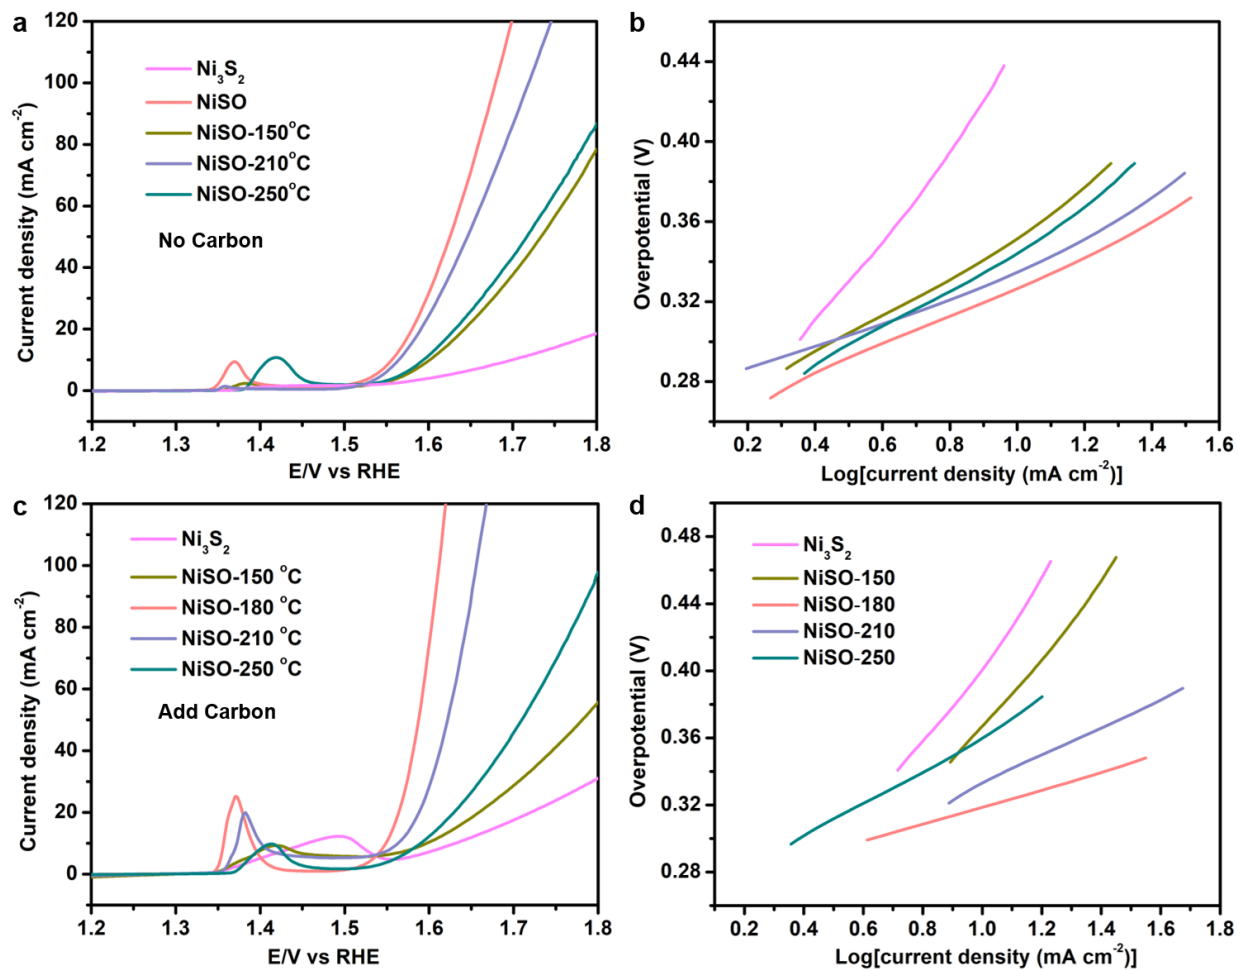

**Figure S6.** (a) LSVs and (b) the relevant Tafel plots of  $\text{Ni}_3\text{S}_2$  and  $\text{NiSO}$  treated at different temperatures tested in 1.0 M KOH without adding carbon. (c) LSVs and (d) the relevant Tafel plots of  $\text{Ni}_3\text{S}_2$  and  $\text{NiSO}$  treated at different temperatures tested in 1.0 M KOH with carbon.

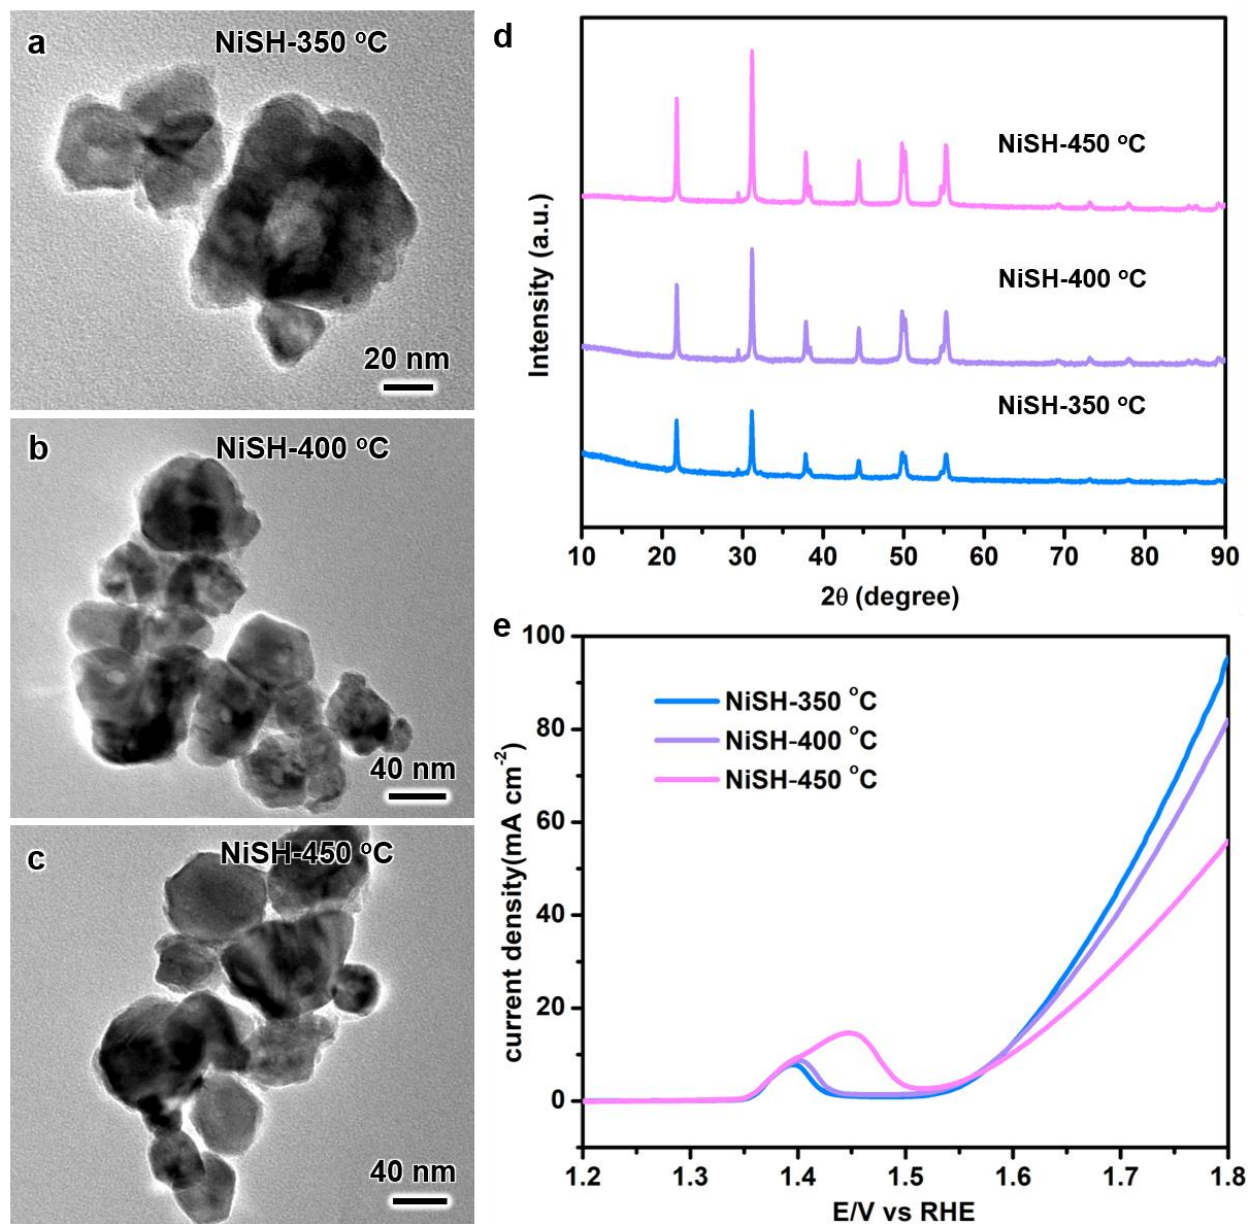

**Figure S7.** (a-c) TEM images, (d) XRD patterns, and (e) LSVs of NiSH (i.e.,  $\text{Ni}_3\text{S}_2$  after heat treatment under 5%  $\text{H}_2/\text{Ar}$  atmosphere) obtained at 350 °C, 400 °C and 450 °C respectively.



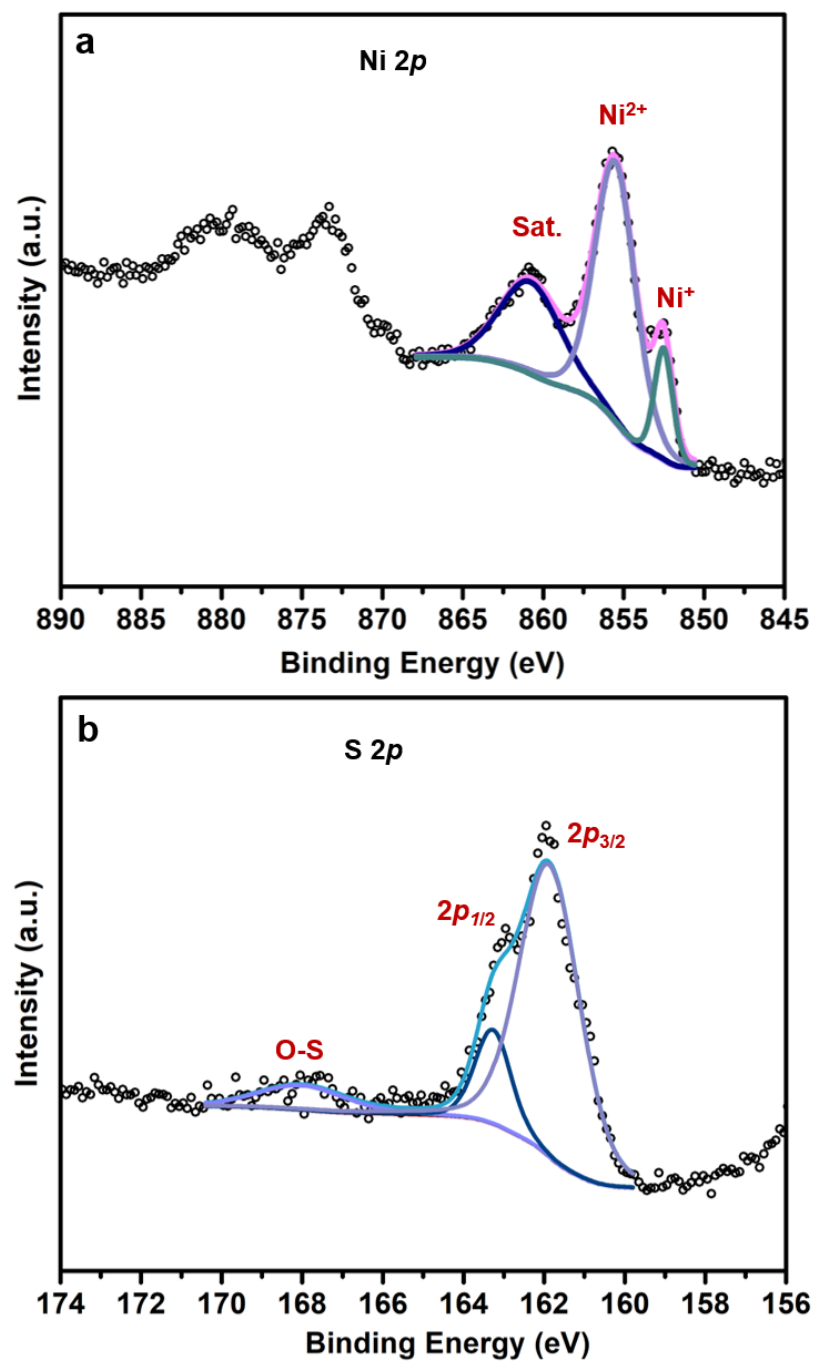

Figure S8. (a) Ni 2p and (b) S 2p XPS spectra of NiSH-400 °C.

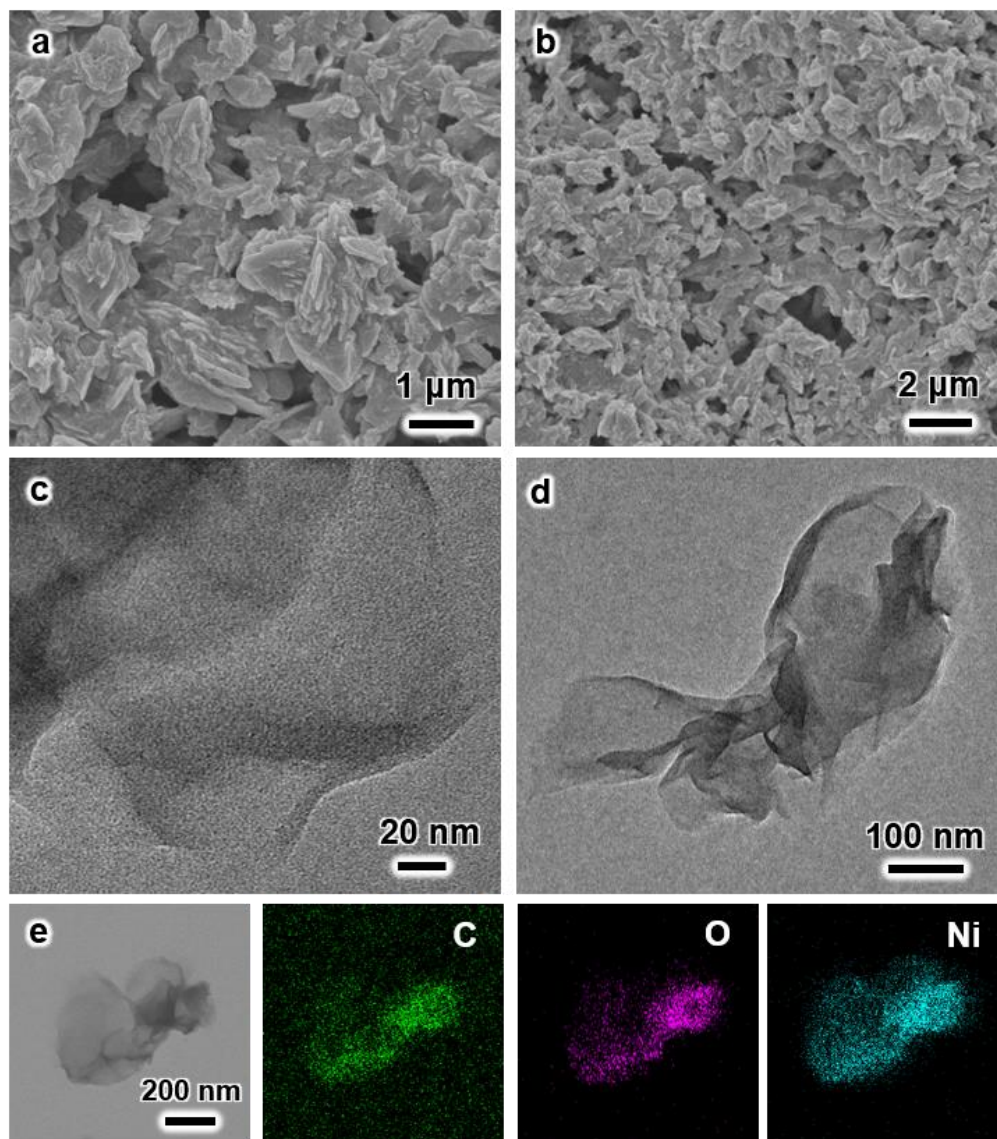

**Figure S9.** (a, b) SEM images, (c, d) TEM images, and (e) elemental mapping images of the Ni-BDC sample.

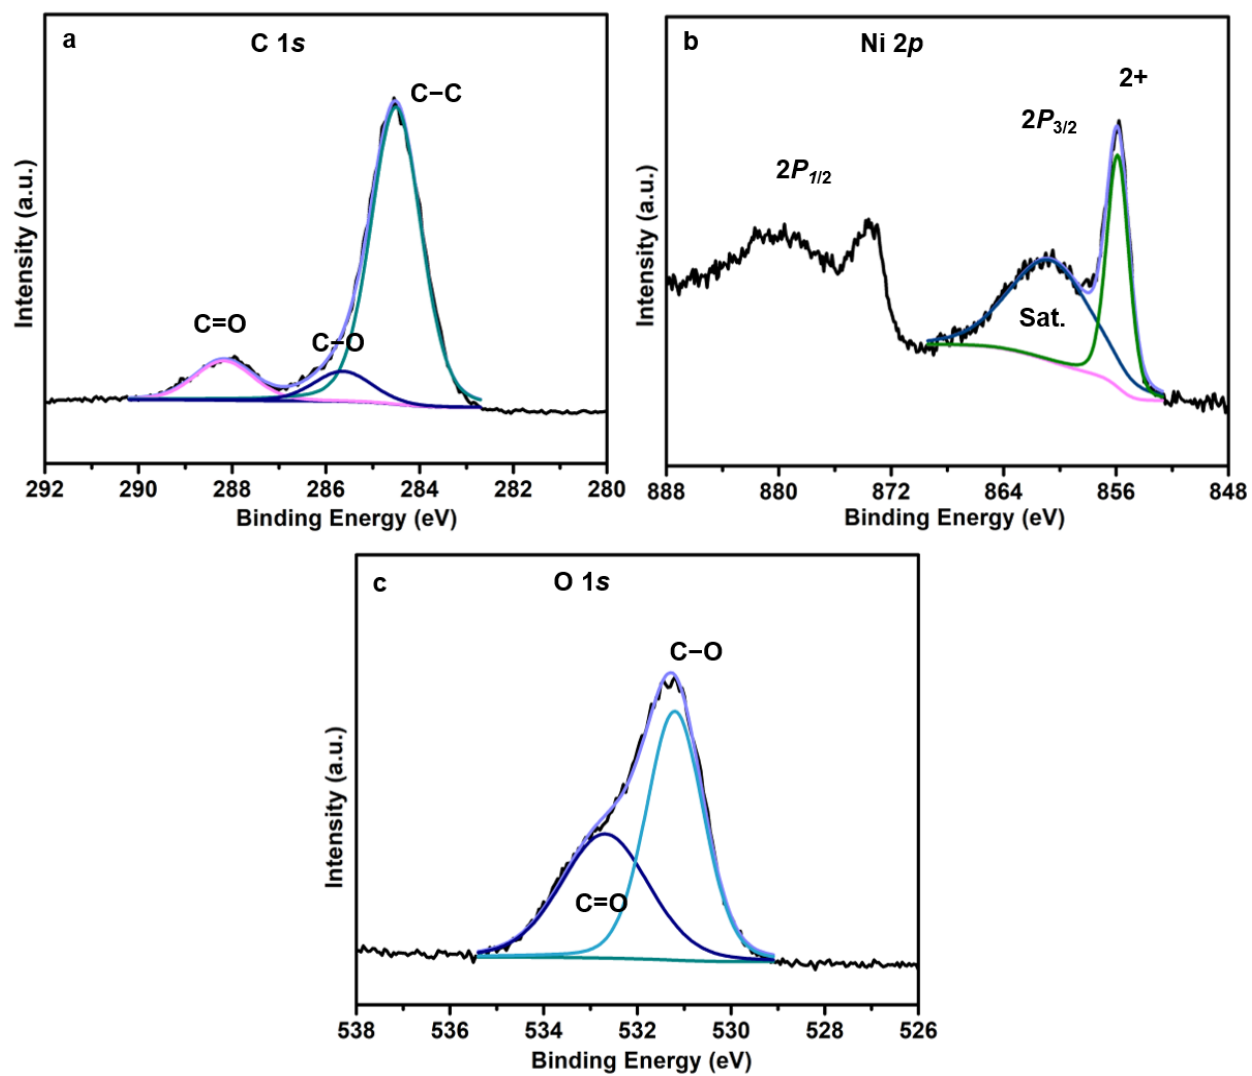

**Figure S10.** (a) C 1s, (b) Ni 2p, and (c) O 1s spectra of the Ni-BDC sample.

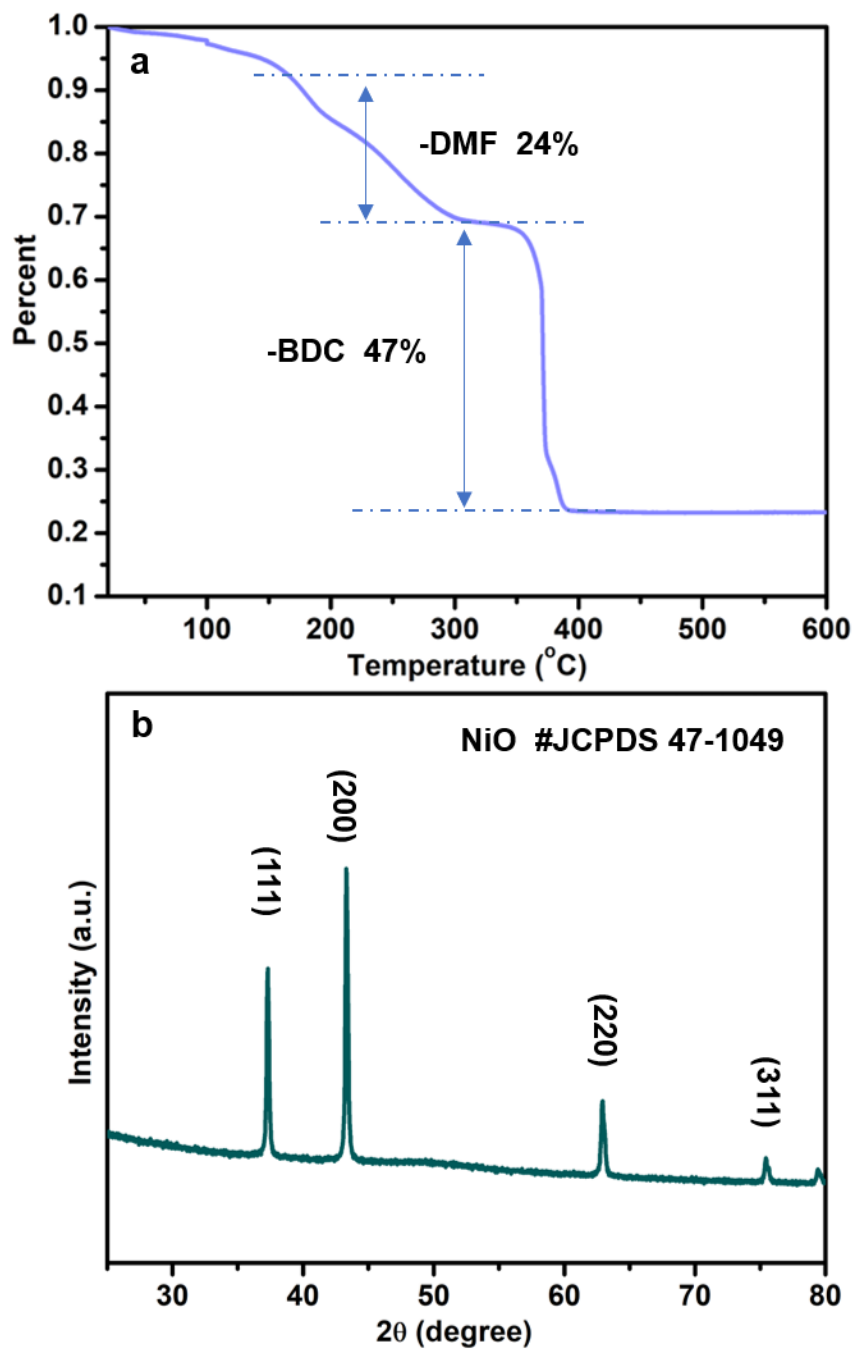

**Figure S11.** (a) TGA curve of the Ni-BDC sample under air atmosphere at a heating rate of 10 °C/min, and (b) XRD pattern of the residue from the TGA test of (a).

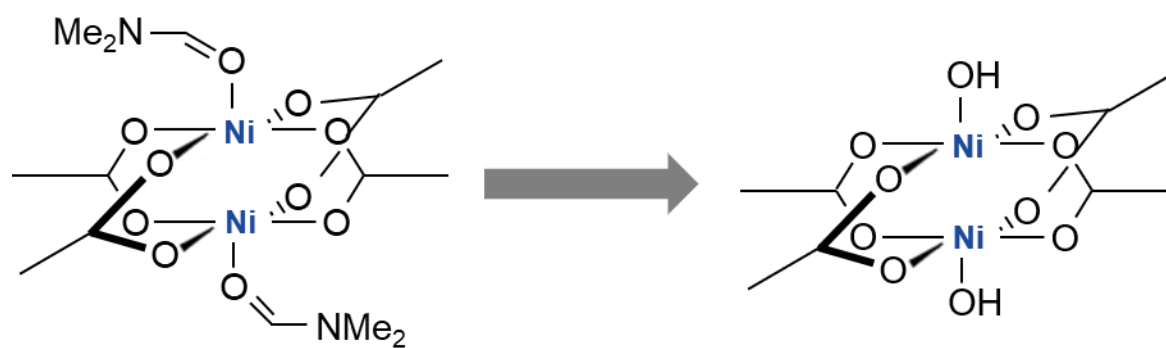

**Figure S12.** Illustration of replacement of solvent molecules (DMF) on each of the two Ni ions by hydroxo or aquo groups to complete the coordination of Ni ions.



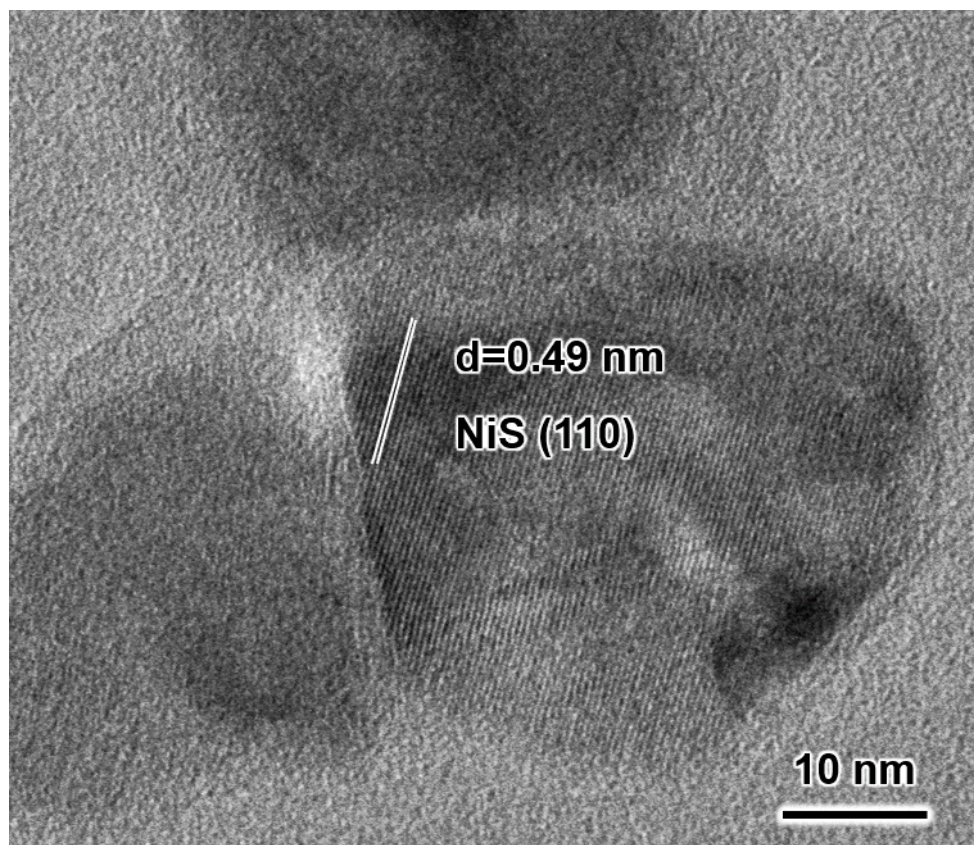

**Figure S13.** High-resolution TEM image of NiSO-BDC hollow nanoparticles. The interplanar spacing is 0.49 nm, which corresponds to  $d_{110}$  of NiS phase.

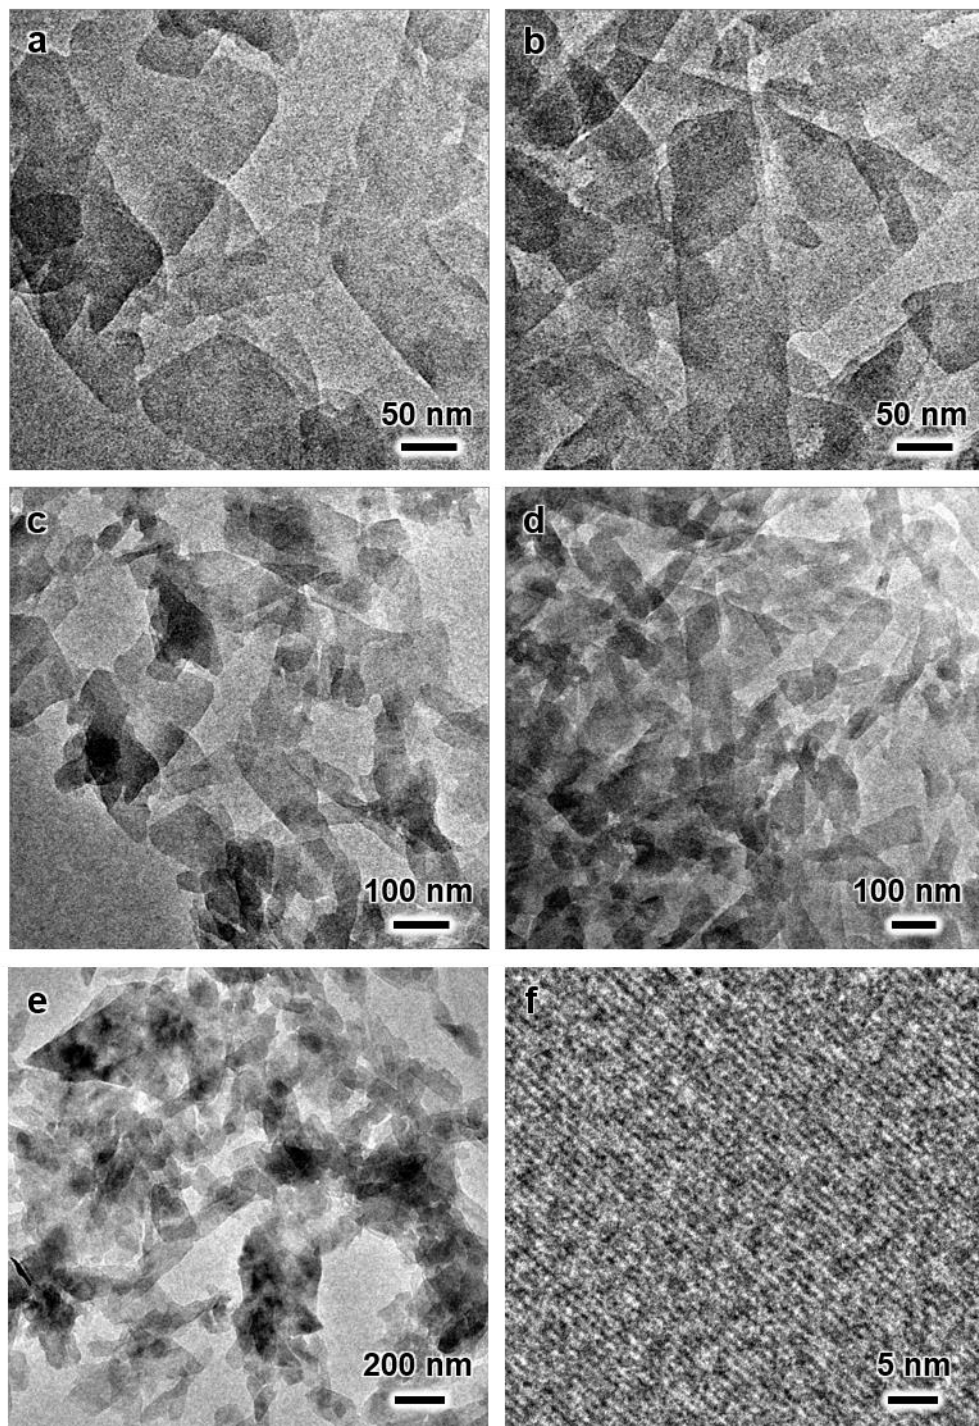

**Figure S14.** TEM images of the Ni-BDC sample after re-solvothermal treatment in a cosolvent (DMF: water: ethanol = 16:1:1).

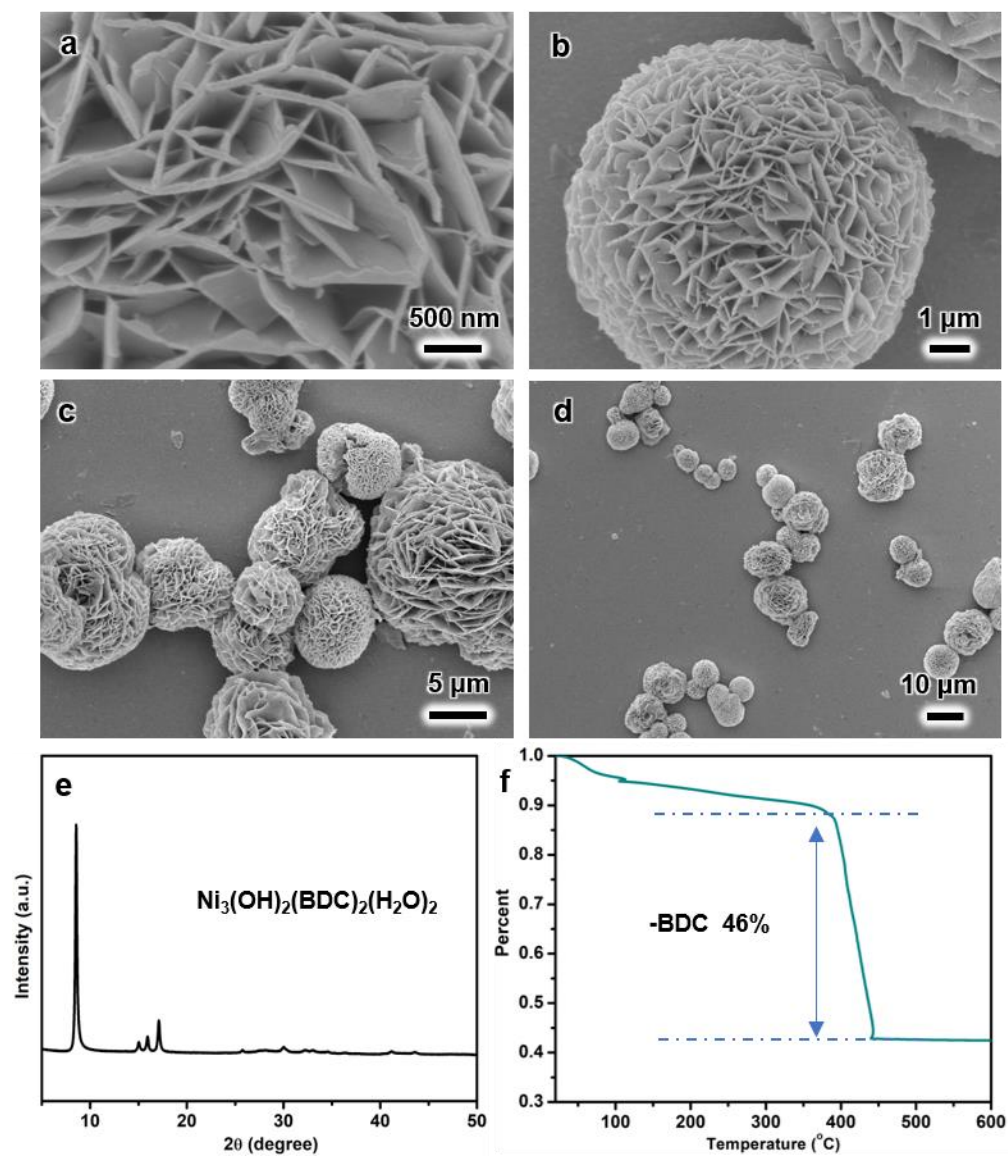

**Figure S15.** (a-d) SEM images, (e) XRD pattern, and (f) TGA curve of the as-prepared  $\text{Ni}_3(\text{OH})_2(\text{BDC})_2(\text{H}_2\text{O})_2$ .

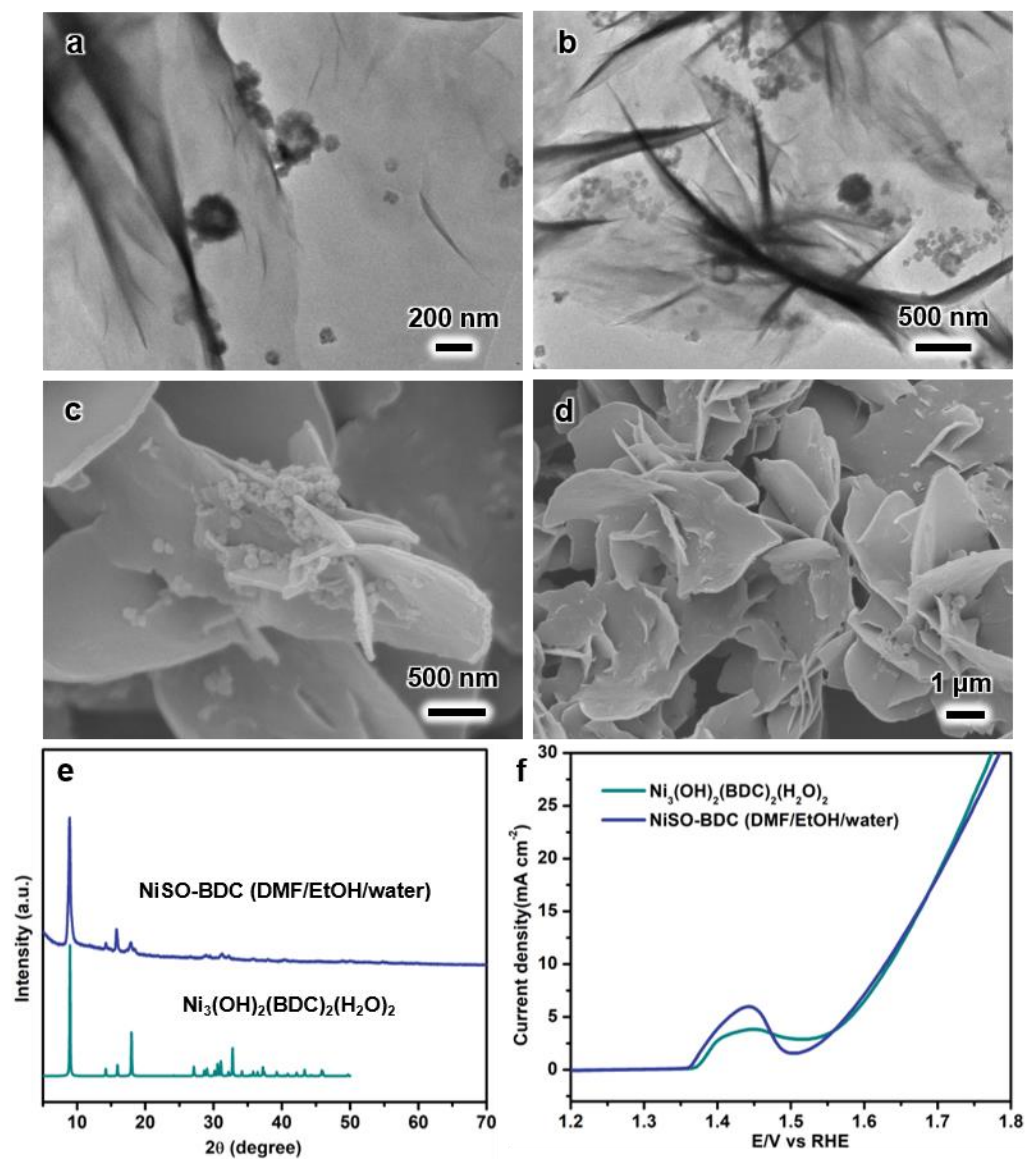

**Figure S16.** (a, b) TEM images, (c, d) SEM images of the as-prepared  $\text{Ni}_3(\text{OH})_2(\text{BDC})_2(\text{H}_2\text{O})_2$ . (e) XRD pattern, and (f) OER tests of the as-prepared  $\text{Ni}_3(\text{OH})_2(\text{BDC})_2(\text{H}_2\text{O})_2$  and  $\text{NiSO-BDC}$  prepared directly using a cosolvent (DMF:ethanol:water = 16:1:1) at 120°C for 24 h.



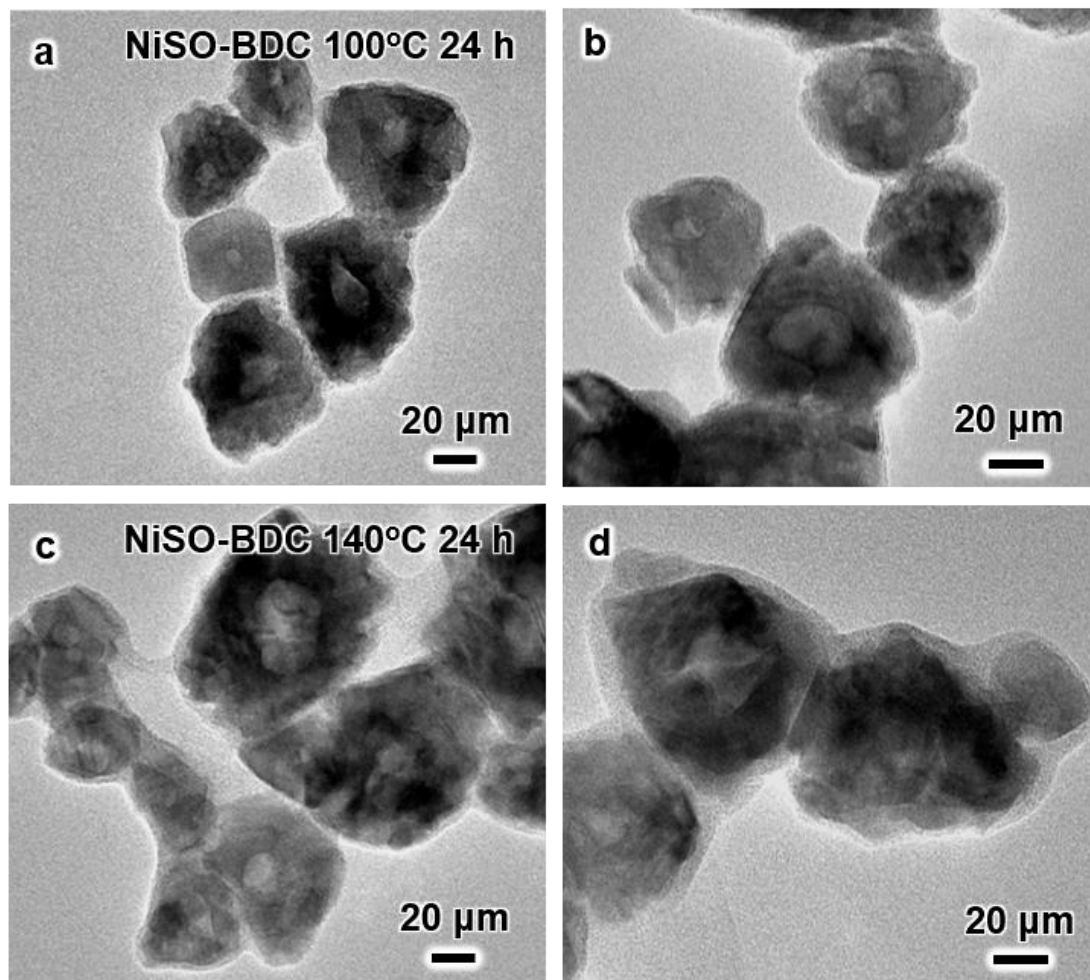

**Figure S17.** TEM images (a, b) and (c, d) are NiSO-BDC samples prepared at 100°C and 140°C for 24 h respectively.



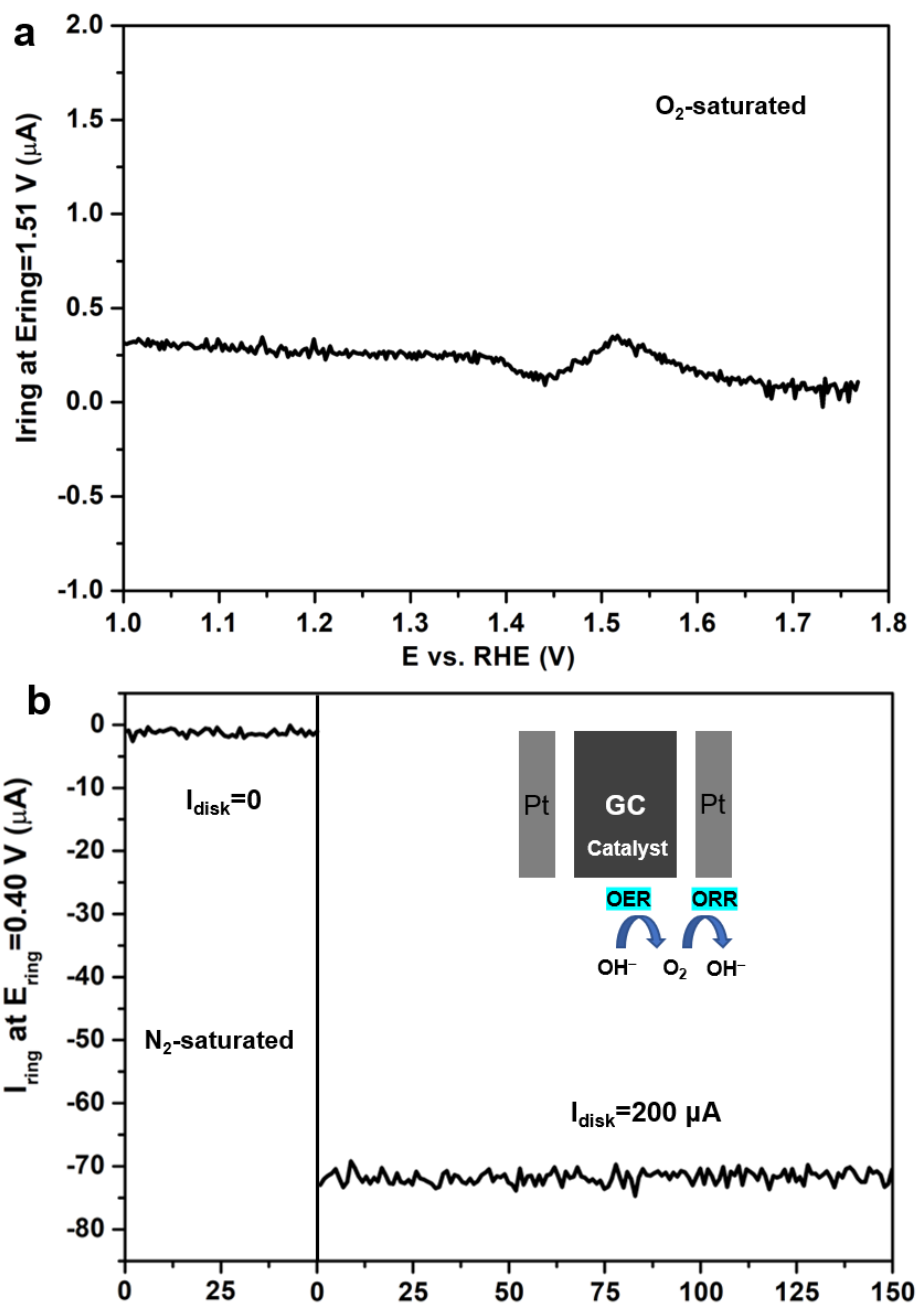

**Figure S18.** (a) The ring current of NiSO-BDC on a RRDE (1500 rpm) in  $\text{O}_2$ -saturated 0.1M KOH solution (ring potential: 1.51 V). (b) The ring current of NiSO-BDC on a RRDE (1500 rpm) in  $\text{N}_2$ -saturated 0.1M KOH solution (ring potential: 0.40 V).

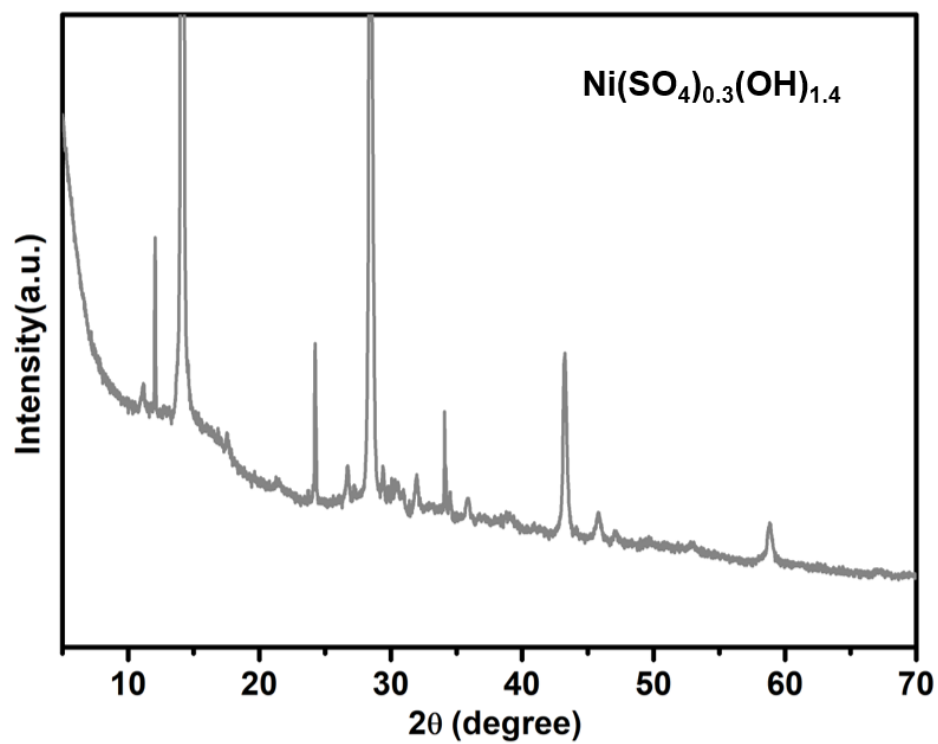

**Figure S19.** The XRD pattern of used NiSO-BDC sample. The phase can be mainly ascribed to  $\text{Ni}(\text{SO}_4)_{0.3}(\text{OH})_{1.4}$ , which is consistent with the XPS spectra.

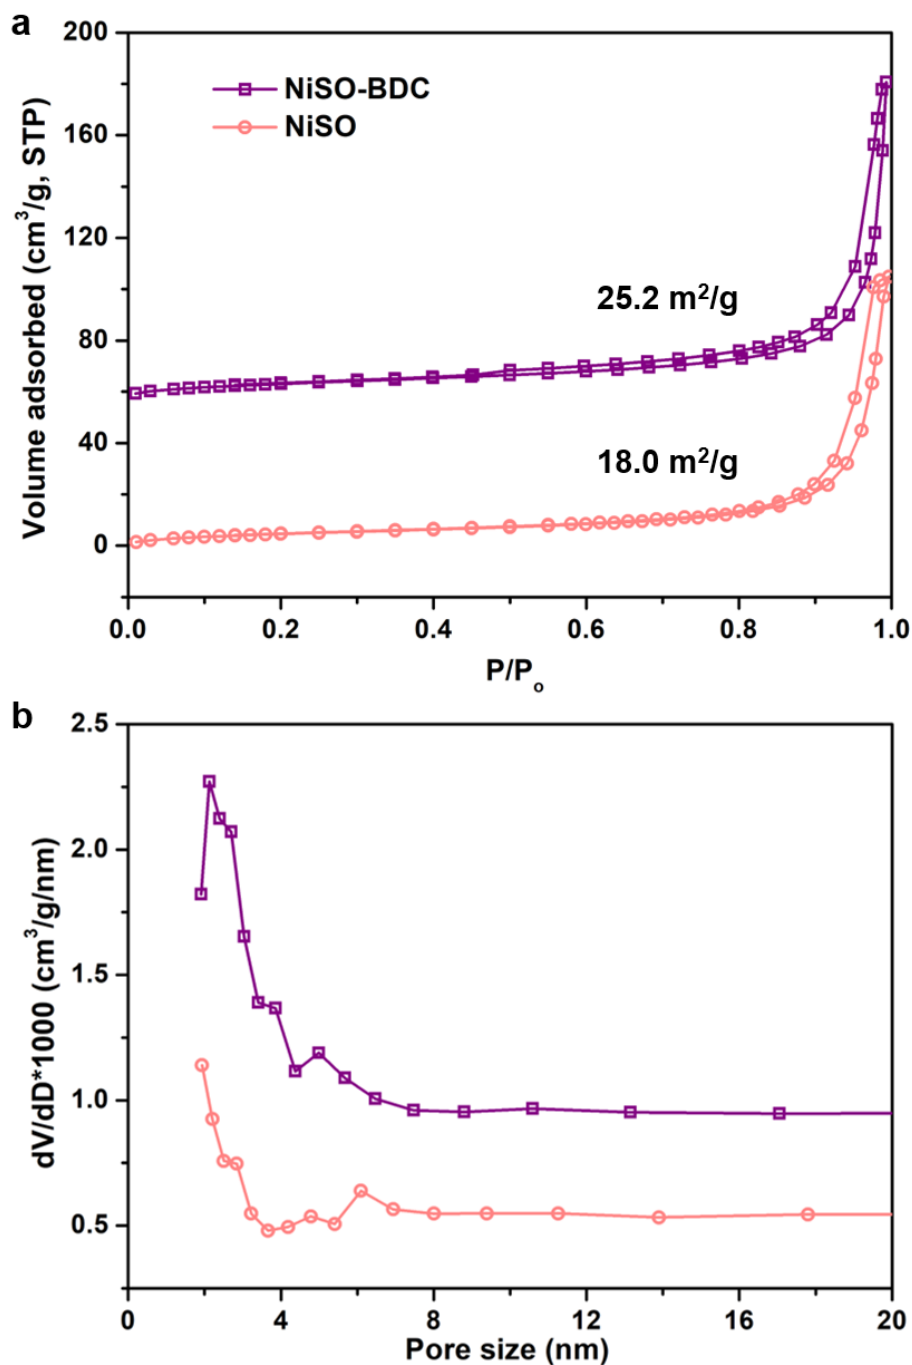

**Figure S20.** The  $N_2$  adsorption-desorption isotherms and volumetric pore size distributions of NiSO and NiSO-BDC samples. The surface area of NiSO-BDC ( $25.2 \text{ m}^2/\text{g}$ ) is slightly increased compared to that of NiSO ( $18.0 \text{ m}^2/\text{g}$ ). Moreover, due to the porous structure of the MOF shell, the mesopores ( $\sim 2.2 \text{ nm}$ ) of NiSO-BDC sample are increased.

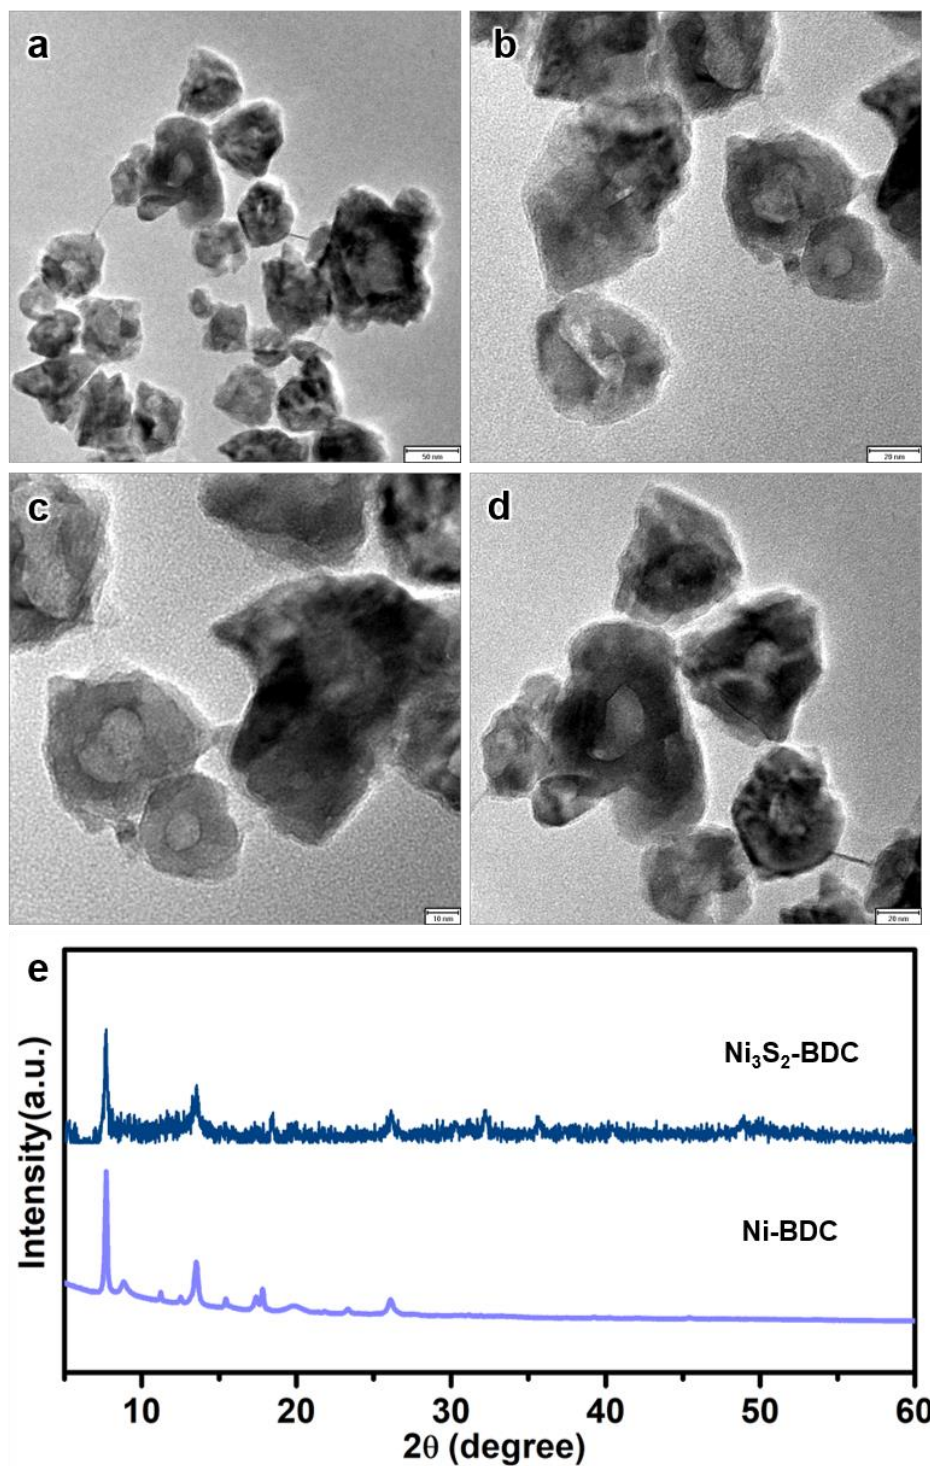

**Figure S21.** (a-d) TEM images of  $\text{Ni}_3\text{S}_2\text{-BDC}$  hollow nanoparticles, and (e) XRD patterns of  $\text{Ni}_3\text{S}_2\text{-BDC}$  and  $\text{Ni-BDC}$ . When  $\text{Ni}_3\text{S}_2$  is directly used to react with  $\text{H}_2\text{BDC}$ ,  $\text{Ni-BDC}$  shell cannot be formed uniformly due to the effect of organic groups adsorbed at the surface of  $\text{Ni}_3\text{S}_2$ .

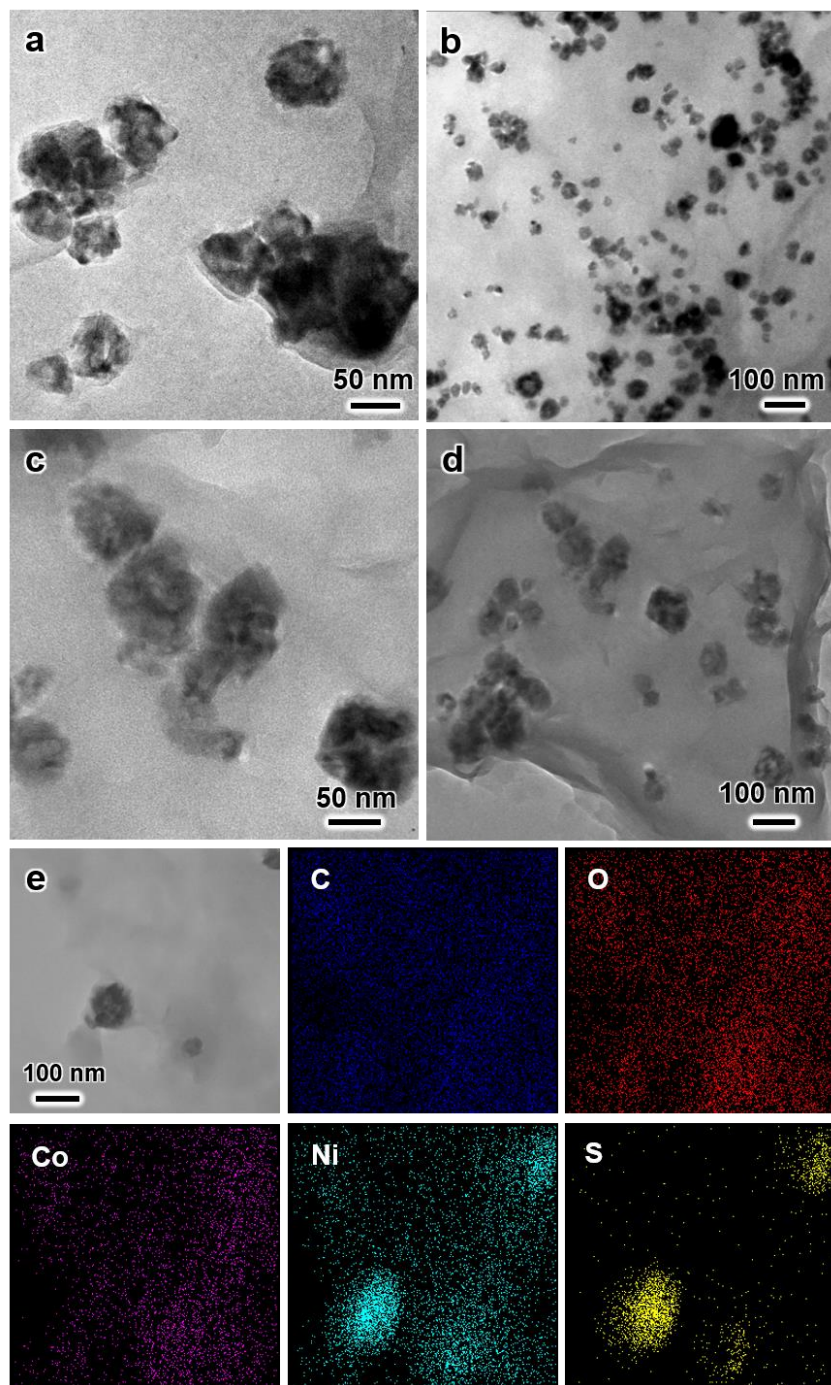

**Figure S22.** (a-d) TEM images and (e) element mapping images of NiSO hollow nanoparticles mixed with CoNi-BDC-TEA. This sample was prepared as follow: 30 mg of NiSO hollow nanoparticles was dispersed in 36 mL of a cosolvent of DMF, ethanol and DI water (DMF:ethanol:water = 16:1:1) by sonication for 20 min, and then 62 mg of terephthalic acid was added. Subsequently, 44 mg of  $\text{CoCl}_2 \cdot 6\text{H}_2\text{O}$  and 44 mg of  $\text{NiCl}_2 \cdot 6\text{H}_2\text{O}$  were added. After  $\text{Co}^{2+}$  and  $\text{Ni}^{2+}$  salts were dissolved, 0.4 mL of TEA was quickly injected into the above colloidal solution. Afterward, the colloidal solution was continuously stirred for 8 h at room temperature. Finally, the products were obtained via centrifugation, washed with ethanol for 3 times, and dried at  $60^\circ\text{C}$ .



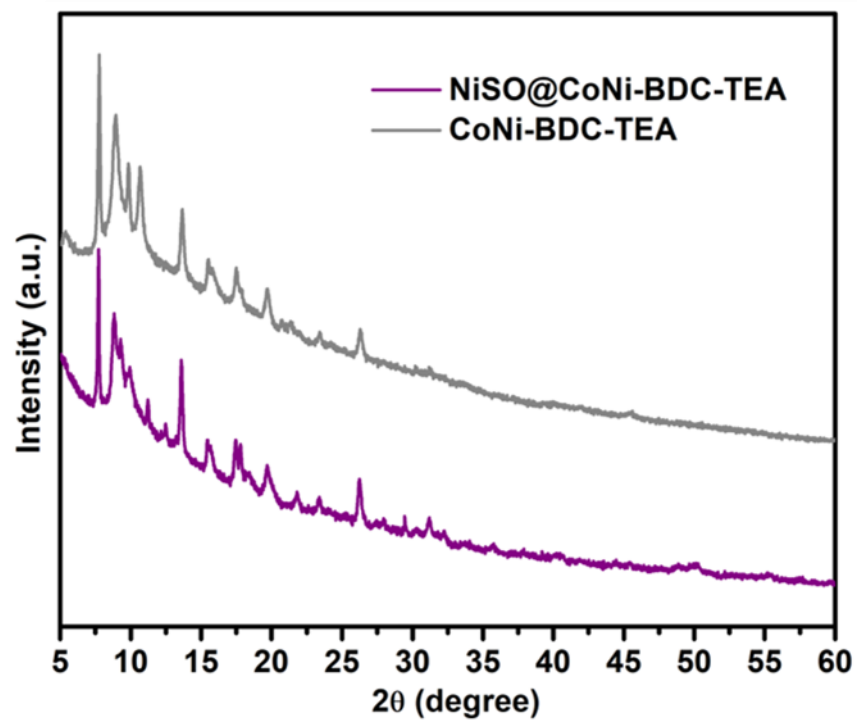

**Figure S23.** XRD patterns of CoNi-BDC-TEA and NiSO@CoNi-BDC-TEA.

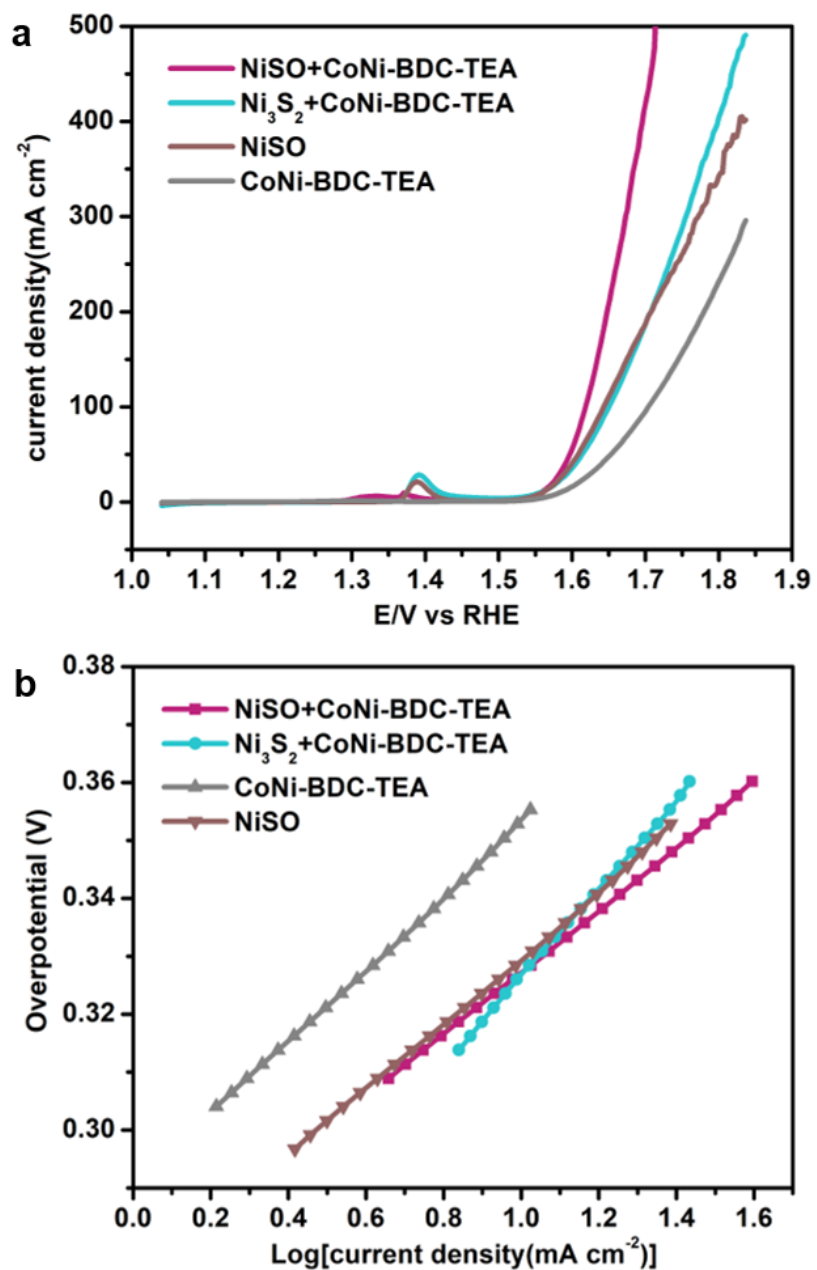

**Figure S24.** (a) LSVs and (b) the related Tafel plots of our prepared samples tested in 1.0 M KOH with addition of carbon.

**Table S1.** Carbon, hydrogen, nitrogen and sulfur (CHNS) analysis of the Ni-BDC sample.

| Ni-BDC | C      | H     | N     |
|--------|--------|-------|-------|
| wt%    | 41.93% | 4.08% | 4.68% |

**Table S2.** The impedance parameters obtained by fitting

| Electrocatalysts | Rs ( $\Omega$ ) | Rct ( $\Omega$ ) |
|------------------|-----------------|------------------|
| NiSO             | 4.6             | 6.4              |
| NiSO-BDC         | 3.2             | 5.0              |

**Table S3.** Comparison of the OER catalytic performance of our NiSO-BDC to other recently reported high-performance OER electrocatalysts using  $\text{Ni}_x\text{S}_y$  or MOFs.

| Catalyst                                                                                                         | Electrolyte                   | Substrate | $\eta(\text{mV})@10$<br>$\text{mA}\cdot\text{cm}^{-2}$ | Tafel slope<br>( $\text{mV}\cdot\text{dec}^{-1}$ ) | Ref. (year)        |
|------------------------------------------------------------------------------------------------------------------|-------------------------------|-----------|--------------------------------------------------------|----------------------------------------------------|--------------------|
| NiCo-UMOFNs                                                                                                      | 1.0 M KOH                     | GC        | 250                                                    | 42                                                 | 2016 <sup>2</sup>  |
| Fe/Ni/Co (Mn)-MIL-53                                                                                             | 1.0 M KOH                     | GC        | 236@20<br>$\text{mA}\cdot\text{cm}^{-2}$               | 52.2                                               | 2018 <sup>3</sup>  |
| $[\{\text{Fe}_3(\mu_3\text{-O})(\text{bdc})_3\}_4\text{-}\{\text{Co}_2(\text{na})_4(\text{L}^{\text{T}})_2\}_3]$ | pH = 13                       | GC        | 225                                                    |                                                    | 2017 <sup>4</sup>  |
| $\text{Ti}_3\text{C}_2\text{T}_x\text{-CoBDC}$                                                                   | 0.1 M KOH                     | GC        | 410                                                    | 48.2                                               | 2017 <sup>5</sup>  |
| NiFe-MOF                                                                                                         | 0.1M KOH                      | NF        | 240                                                    | 34                                                 | 2017 <sup>6</sup>  |
| GO/Cu-MOF                                                                                                        | 0.5 M $\text{H}_2\text{SO}_4$ | GC        | 119 (onset potential)                                  | 65                                                 | 2013 <sup>7</sup>  |
| $[\text{Co}_2(\mu\text{-Cl})_2(\text{bbta})]$                                                                    | 1.0 M KOH                     | GC        | 292                                                    |                                                    | 2016 <sup>8</sup>  |
| PCN-224-Ni                                                                                                       | pH = 7                        | FTO       | 450 (onset potential)                                  | 150                                                | 2016 <sup>9</sup>  |
| High-index faceted $\text{Ni}_3\text{S}_2$                                                                       | 1.0 M KOH                     | NF        | 260                                                    |                                                    | 2018 <sup>10</sup> |
| N- $\text{Ni}_3\text{S}_2$                                                                                       | 1.0 M KOH                     | NF        | 330@100<br>$\text{mA}\cdot\text{cm}^{-2}$              | 70                                                 | 2017 <sup>11</sup> |

|                                                  |           |    |                                |    |                    |
|--------------------------------------------------|-----------|----|--------------------------------|----|--------------------|
| MoS <sub>2</sub> -Ni <sub>3</sub> S <sub>2</sub> | 1.0 M KOH | NF | 249                            | 57 | 2017 <sup>12</sup> |
| Ni-Fe-OH@Ni <sub>3</sub> S <sub>2</sub>          | 1.0 M KOH | NF | 240@100<br>mA·cm <sup>-2</sup> | 93 | 2017 <sup>13</sup> |
| Fe <sub>0.1</sub> -NiS <sub>2</sub> NA           | 1.0 M KOH | Ti | 231@100<br>mA·cm <sup>-2</sup> | 43 | 2016 <sup>14</sup> |

---

## References

1. Wang, J. H.; Cheng, Z.; Bredas, J. L.; Liu, M., Electronic and Vibrational Properties of Nickel Sulfides from First Principles. *J. Chem. Phys.* **2007**, *127*, 214705-214713.
2. Zhao, S.; Wang, Y.; Dong, J.; He, C.T.; Yin, H.; An, P.; Zhao, K.; Zhang, X.; Gao, C.; Zhang, L.; Lv, J.; Wang, J.; Zhang, J.; Khattak, A. M.; Khan, N. A.; Wei, Z.; Zhang, J.; Liu, S.; Zhao, H.; Tang, Z., Ultrathin Metal–Organic Framework Nanosheets for Electrocatalytic Oxygen Evolution. *Nat. Energy* **2016**, *1*, 16184-16193.
3. Li, F. L.; Shao, Q.; Huang, X.; Lang, J. P., Nanoscale Trimetallic Metal–Organic Frameworks Enable Efficient Oxygen Evolution Electrocatalysis. *Angew. Chem., Int. Ed.* **2018**, *57*, 1888-1892.
4. Shen, J. Q.; Liao, P. Q.; Zhou, D. D.; He, C. T.; Wu, J. X.; Zhang, W. X.; Zhang, J. P.; Chen, X. M., Modular and Stepwise Synthesis of a Hybrid Metal–Organic Framework for Efficient Electrocatalytic Oxygen Evolution. *J. Am. Chem. Soc.* **2017**, *139*, 1778-1781.
5. Zhao, L.; Dong, B.; Li, S.; Zhou, L.; Lai, L.; Wang, Z.; Zhao, S.; Han, M.; Gao, K.; Lu, M.; Xie, X.; Chen, B.; Liu, Z.; Wang, X.; Zhang, H.; Li, H.; Liu, J.; Zhang, H.; Huang, X.; Huang, W., Interdiffusion Reaction-Assisted Hybridization of Two-Dimensional Metal–Organic Frameworks and Ti<sub>3</sub>C<sub>2</sub>T<sub>x</sub> Nanosheets for Electrocatalytic Oxygen Evolution. *ACS Nano* **2017**, *11*, 5800-5807.
6. Duan, J.; Chen, S.; Zhao, C., Ultrathin Metal–Organic Framework Array for Efficient Electrocatalytic Water Splitting. *Nat. Commun.* **2017**, *8*, 15341-15348.
7. Jahan, M.; Liu, Z.; Loh, K. P., A Graphene Oxide and Copper-Centered Metal Organic Framework Composite as a Tri-Functional Catalyst for HER, OER, and ORR. *Adv. Funct. Mater.* **2013**, *23*, 5363-5372.
8. Lu, X. F.; Liao, P. Q.; Wang, J. W.; Wu, J. X.; Chen, X. W.; He, C. T.; Zhang, J. P.; Li, G. R.; Chen, X. M., An Alkaline-Stable, Metal Hydroxide Mimicking Metal–Organic Framework for Efficient Electrocatalytic Oxygen Evolution. *J. Am. Chem. Soc.* **2016**, *138*, 8336-8339.
9. Usov, P. M.; Ahrenholtz, S. R.; Maza, W. A.; Stratakes, B.; Epley, C. C.; Kessinger, M. C.; Zhu, J.; Morris, A. J., Cooperative Electrochemical Water Oxidation by Zr Nodes and Ni–Porphyrin Linkers of a PCN-224 MOF Thin Film. *J. Mater. Chem. A* **2016**, *4*, 16818-16823.

10. Feng, L. L.; Yu, G.; Wu, Y.; Li, G. D.; Li, H.; Sun, Y.; Asefa, T.; Chen, W.; Zou, X., High-Index Faceted  $\text{Ni}_3\text{S}_2$  Nanosheet Arrays as Highly Active and Ultrastable Electrocatalysts for Water Splitting. *J. Am. Chem. Soc.* **2015**, *137*, 14023-14026.
11. Chen, P.; Zhou, T.; Zhang, M.; Tong, Y.; Zhong, C.; Zhang, N.; Zhang, L.; Wu, C.; Xie, Y., 3D Nitrogen-Anion-Decorated Nickel Sulfides for Highly Efficient Overall Water Splitting. *Adv. Mater.* **2017**, *29*, 1584-1589.
12. Yang, Y.; Zhang, K.; Lin, H.; Li, X.; Chan, H. C.; Yang, L.; Gao, Q.,  $\text{MoS}_2$ - $\text{Ni}_3\text{S}_2$  Heteronanorods as Efficient and Stable Bifunctional Electrocatalysts for Overall Water Splitting. *ACS Catal.* **2017**, *7*, 2357-2366.
13. Zou, X.; Liu, Y.; Li, G. D.; Wu, Y.; Liu, D. P.; Li, W.; Li, H. W.; Wang, D.; Zhang, Y.; Zou, X., Ultrafast Formation of Amorphous Bimetallic Hydroxide Films on 3D Conductive Sulfide Nanoarrays for Large-Current-Density Oxygen Evolution Electrocatalysis. *Adv. Mater.* **2017**, *29*, 404-410 .
14. Yang, N.; Tang, C.; Wang, K.; Du, G.; Asiri, A. M.; Sun, X., Iron-Doped Nickel Disulfide Nanoarray: A Highly Efficient and Stable Electrocatalyst for Water Splitting. *Nano Res.* **2016**, *9*, 3346-3354.
